# Supplementary material for: Tumor-microenvironment-responsive poly-prodrug encapsulated semiconducting polymer nanosystem for phototherapy-boosted chemotherapy
Source: Royal Society of Chemistry journal article supplement (doi:10.1039/d3mh00242j), 2023-01-01
Supplement: d3mh00242j1.pdf [file d3mh00242j1.pdf]

## Supporting information

### **Tumor microenvironment responsive poly-prodrug encapsulated semiconducting polymer for phototherapy boosted chemotherapy**

Jianwei Zhu<sup>1,2</sup>, Yuning Zhang<sup>1</sup>, Zheng Li<sup>2,3</sup>, Xiaowen Bao<sup>1</sup>, Yanfeng Zhou<sup>1</sup>, Bo Ma<sup>1</sup>, Ying Xie<sup>7</sup>, Peiyu Yan<sup>7</sup>, Zimei Wu<sup>6\*</sup>, Qi Zhang<sup>1\*</sup>, Jianhua Zou<sup>2,3\*</sup>, Xiaoyuan Chen<sup>2,3,4,5\*</sup>

1. School of Pharmaceutical Sciences, Nanjing Tech University (Nanjing Tech), 30 South Puzhu Road, Nanjing 211816, China. E-mail: [zhangqi@njtech.edu.cn](mailto:zhangqi@njtech.edu.cn)

2. Departments of Diagnostic Radiology, Surgery, Chemical and Biomolecular Engineering, and Biomedical Engineering, Yong Loo Lin School of Medicine and Faculty of Engineering, National University of Singapore, Singapore, 119074, Singapore. Email: [zoujh-93@nus.edu.sg](mailto:zoujh-93@nus.edu.sg), [chen.shawn@nus.edu.sg](mailto:chen.shawn@nus.edu.sg)

3. Nanomedicine Translational Research Program, NUS Center for Nanomedicine, Yong Loo Lin School of Medicine, National University of Singapore, Singapore 117597, Singapore

4. Clinical Imaging Research Centre, Centre for Translational Medicine, Yong Loo Lin School of Medicine, National University of Singapore, Singapore 117599, Singapore

5. Institute of Molecular and Cell Biology, Agency for Science, Technology, and Research (A\*STAR), 61 Biopolis Drive, Proteos, Singapore 138673, Singapore

6. School of Pharmacy, Faculty of Medical and Health Sciences, The University of Auckland Private Bag 92019, Auckland 1142, New Zealand. Email: [z.wu@auckland.ac.nz](mailto:z.wu@auckland.ac.nz)

7. State Key Laboratory of Quality Research in Chinese Medicines, Macau University of Science and Technology, Taipa, Macau (SAR), 999078, P.R. China.



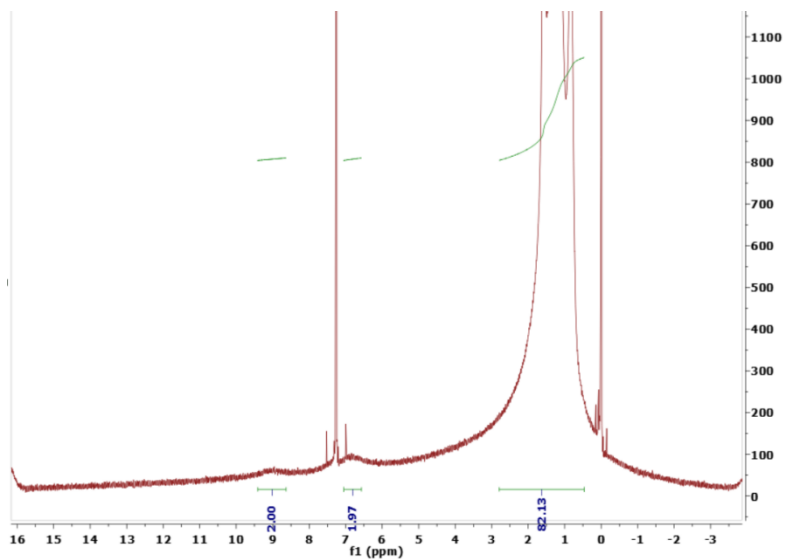

Fig. S3  $^1\text{H}$ NMR of TDPP in  $\text{CDCl}_3$ .

**Cirrus GPC Sample Injection Report**

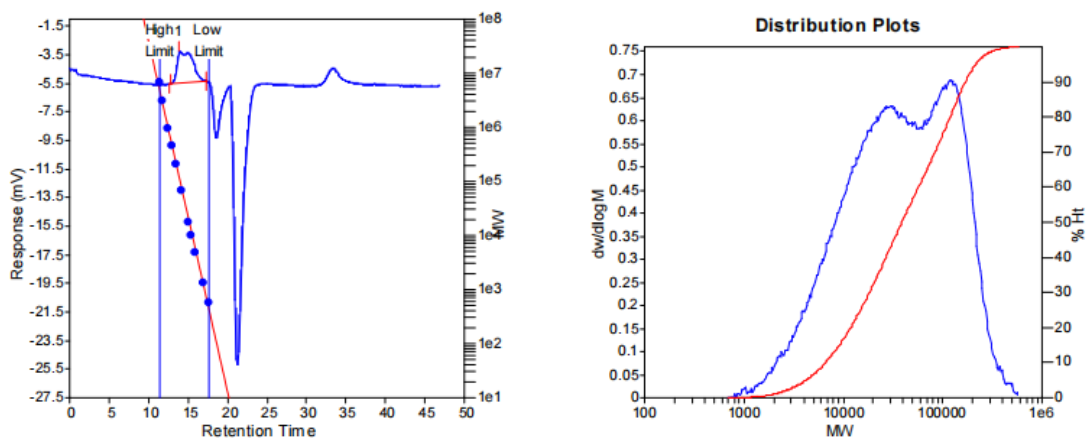

**MW Averages**

| Peak No | Mp     | Mn    | Mw    | Mz     | Mz+1   | Mv    | PD      |
|---------|--------|-------|-------|--------|--------|-------|---------|
| 1       | 119372 | 16187 | 67184 | 146875 | 216375 | 56255 | 4.15049 |

**Processed Peaks**

| Peak No | Name | Start RT (mins) | Max RT (mins) | End RT (mins) | Pk Height (mV) | % Height | Area (mV.secs) | % Area |
|---------|------|-----------------|---------------|---------------|----------------|----------|----------------|--------|
| 1       |      | 12.83           | 13.88         | 17.33         | 2.24547        | 0        | 301.856        | 100    |

Fig. S4 GPC of TDPP in trichlorobenzene at 150 °C.

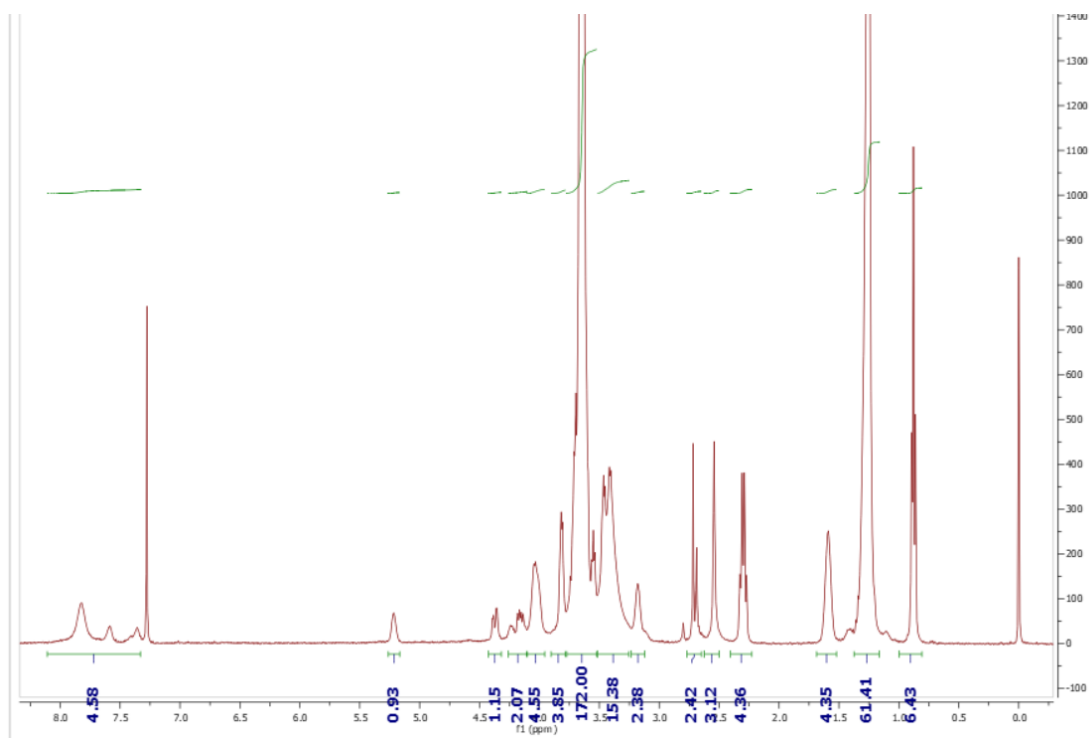

Fig. S5  $^1\text{H}$ NMR of PEG-TPZ in  $\text{CDCl}_3$ .

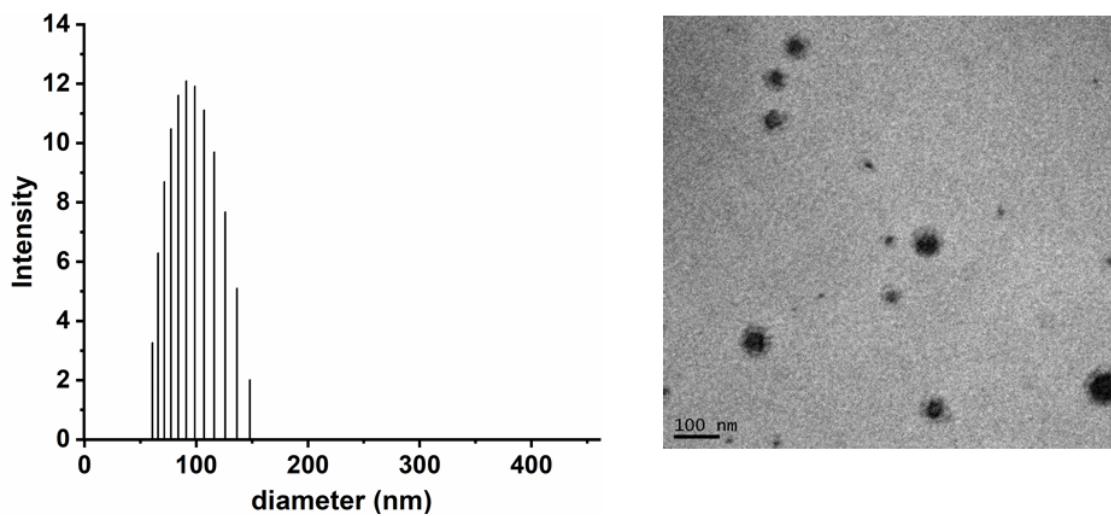

Fig. S6 (a) DLS and TEM of TDPP@DSPE-PEG NPs.

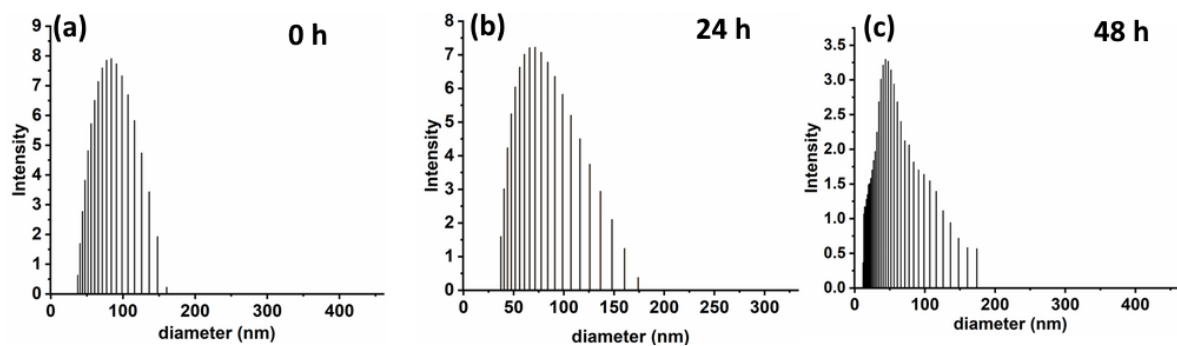

Fig. S7 DLS of TDPP@PEG-TPZ in PBS (pH 7.4) at 0, 24 and 48 h.

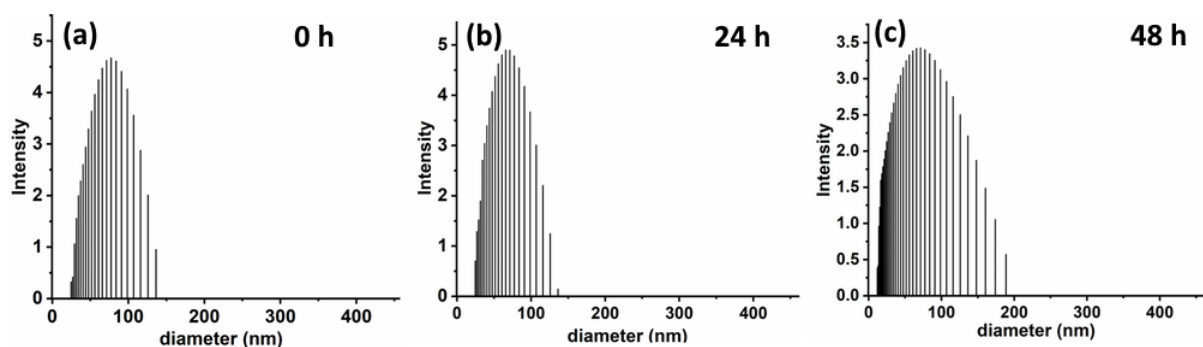

Fig. S8 DLS of TDPP@PEG-TPZ in FBS at 0, 24 and 48 h.

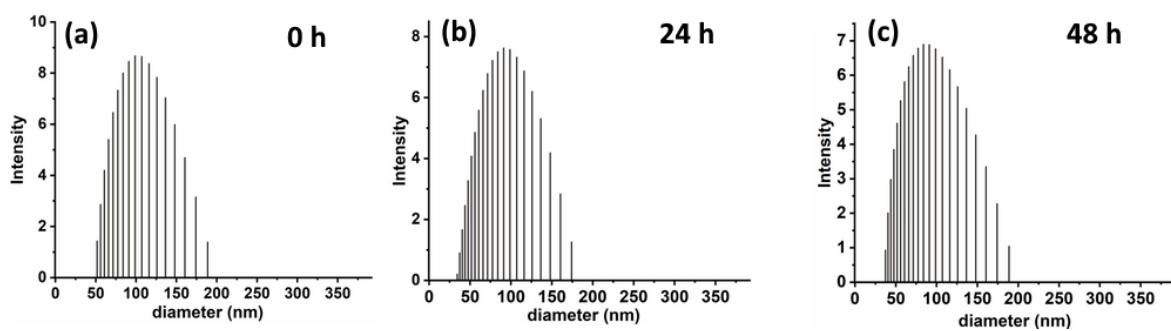

Fig. S9 DLS of TDPP@PEG-TPZ in DMEM at 0, 24 and 48 h.

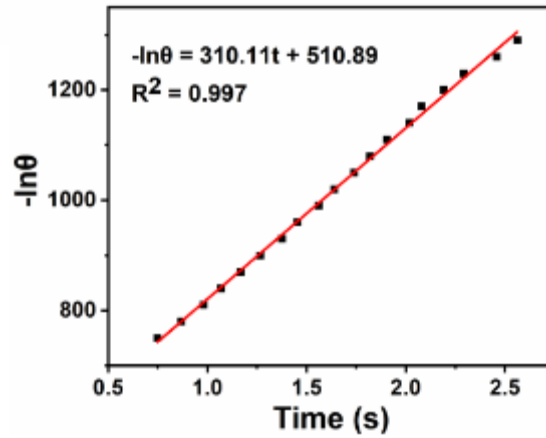

Fig. S10 Linear fitting of time versus  $-\ln\theta$  curve

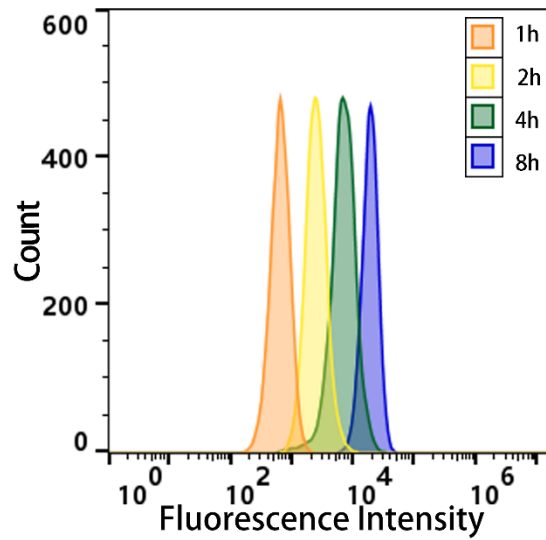

Fig. S11 Cellular uptake of TDPP@PEG-TPZ by flow cytometry.

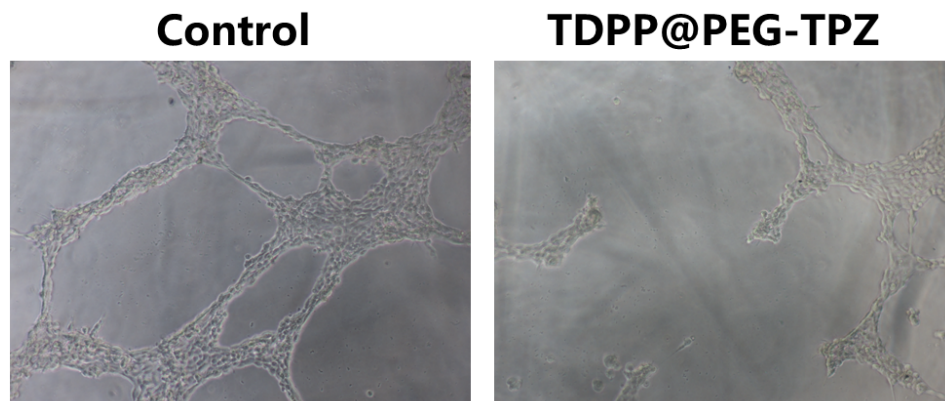

Fig. S12 *In vitro* existing vessels destruction assay in the control and TDPP@PEG-TPZ with irradiation groups.

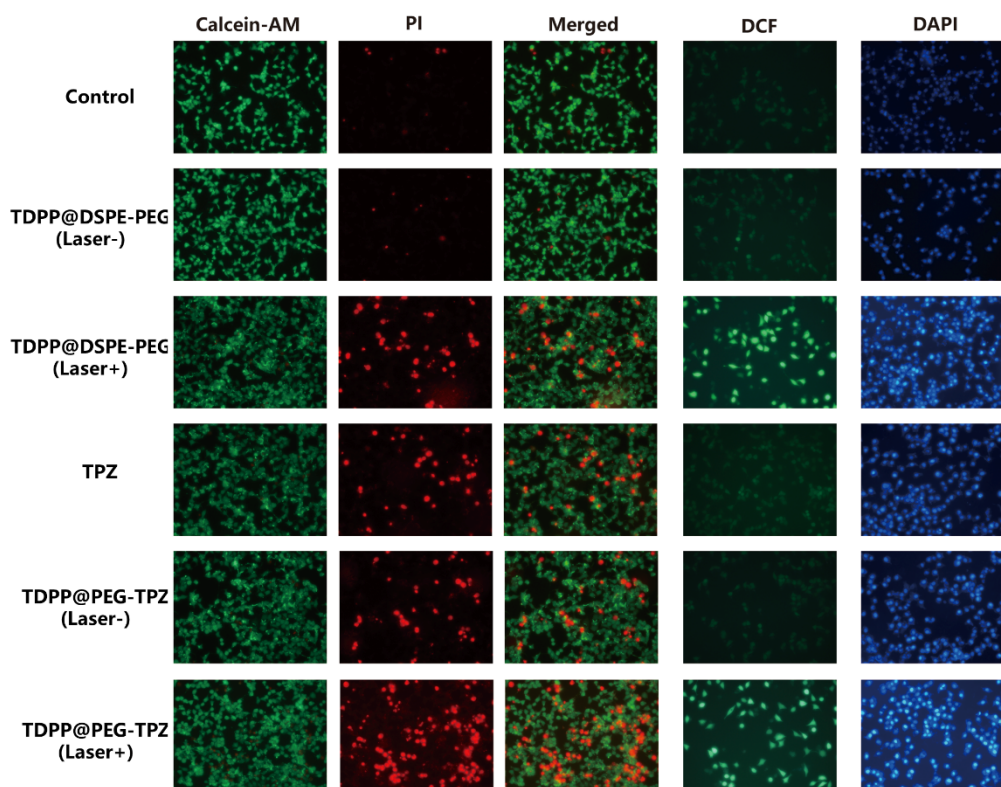

Fig. S13 Live and dead cells co-staining and ROS detection with DCF-DA as a probe. Scale bar: 10  $\mu$ m.

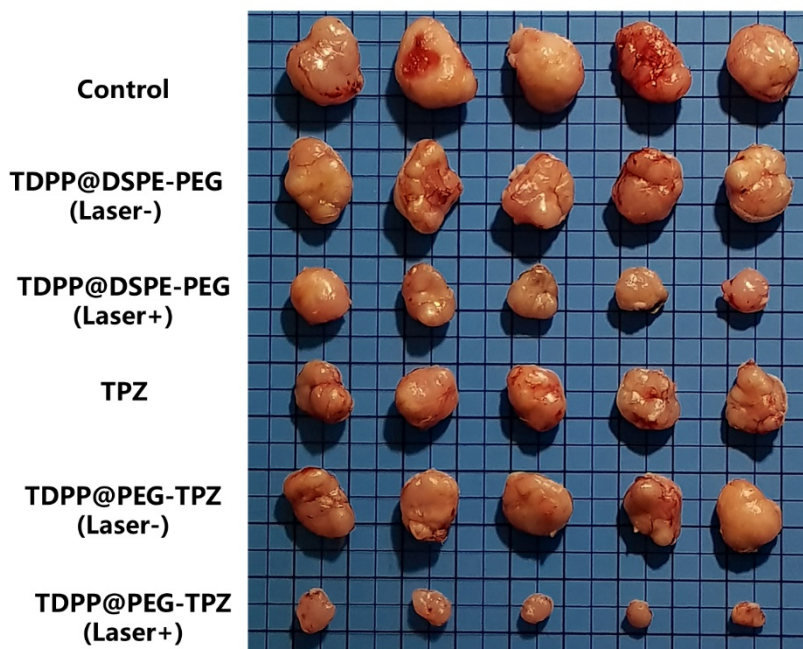

Fig. S14 Tumor pictures of Control, TDPP with/without laser irradiation, TPZ only, TDPP@PEG-TPZ with/without irradiation groups.



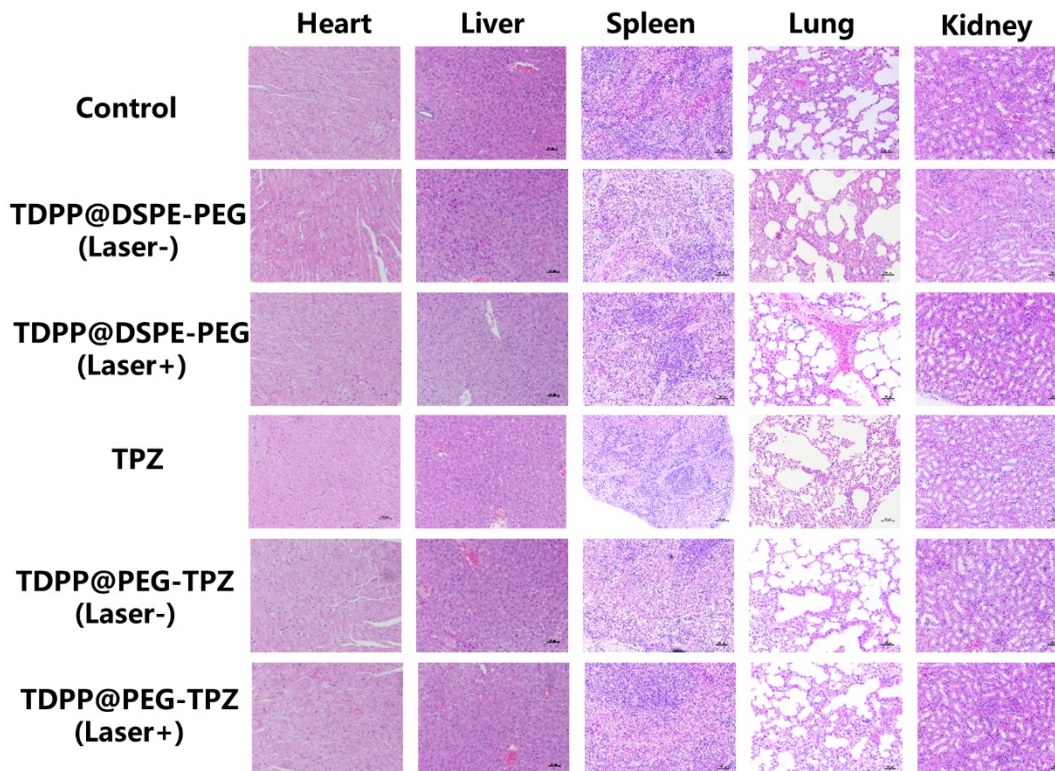

Fig. S15 H&E staining pictures of heart, liver, spleen, lung and kidney. Scale bar: 10  $\mu$ m.

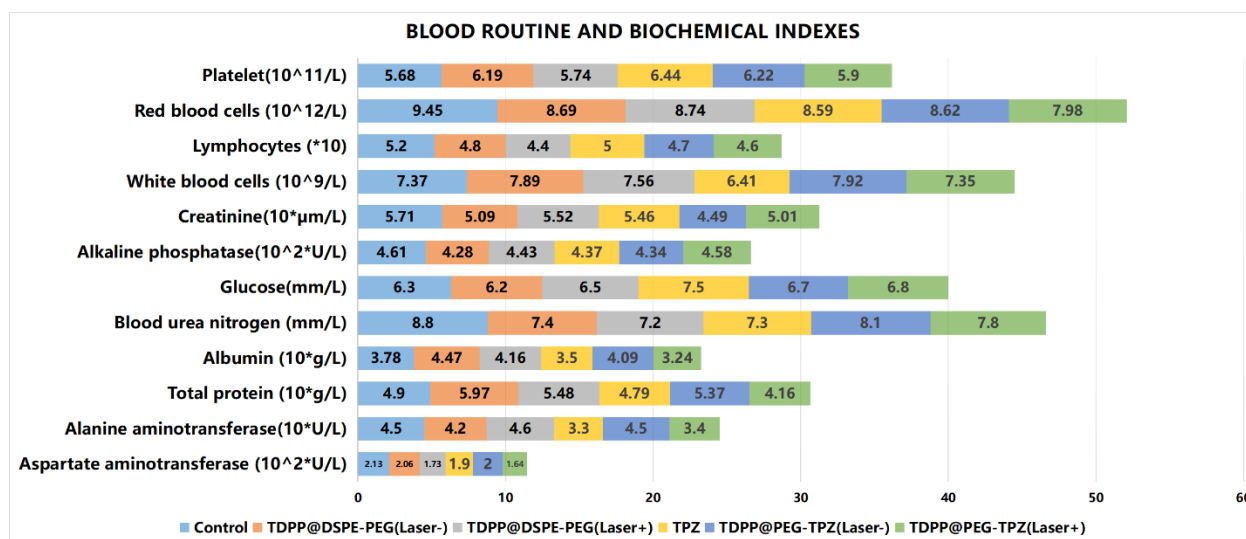

Fig. S16 Blood routine and biochemical indexes, including aspartate aminotransferase, alanine aminotransferase, total protein, albumin in each group, blood urea nitrogen, glucose, alkaline phosphatase, creatinine, white blood cells, lymphocytes (%), red blood cells, platelet parameter of mice in each group.



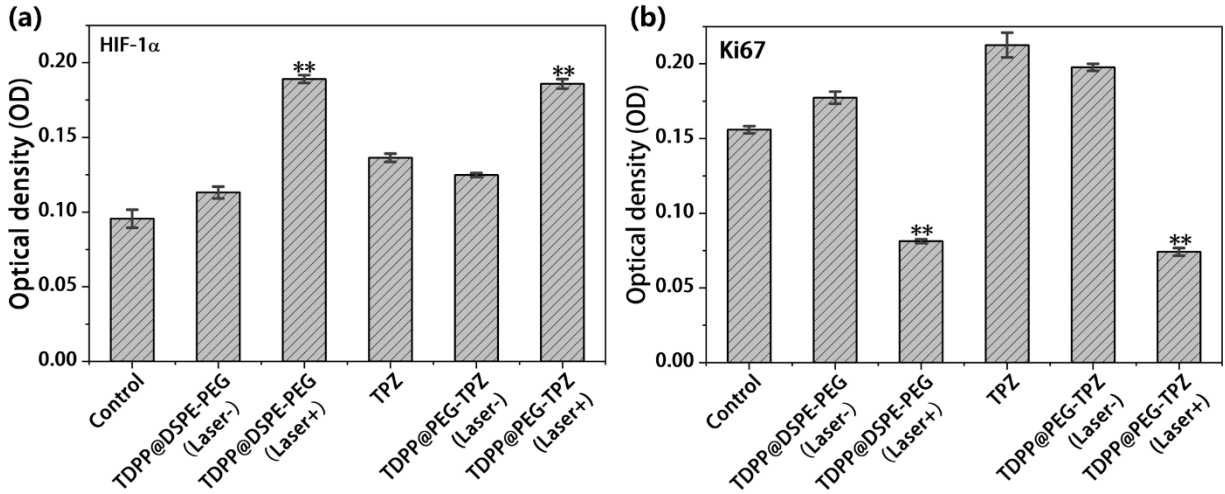

Fig. S17 Expression of HIF-1 $\alpha$  and Ki67 in the tumor of each group, compared with control group. (\*\* $p < 0.01$ ).
